# Supplementary material for: From NH4TiOF3nanoparticles to NH4TiOF3mesocrystals: steric hindrance versus hydrophobic attraction of F127 molecules
Source: Royal Society of Chemistry journal article supplement (doi:10.1039/c2ce26135a), 2012-11-07
Supplement: c2ce26135a.pdf [file c2ce26135a.pdf]

## Electronic Supplementary Information

# From NH<sub>4</sub>TiOF<sub>3</sub> Nanoparticles to NH<sub>4</sub>TiOF<sub>3</sub> Mesocrystals: Steric Hindrance versus Hydrophobic Attraction of F127 Molecules

*Yanqiong LIU, Yu ZHANG, and John WANG\**

Department of Materials Science and Engineering, Faculty of Engineering, National University of

Singapore, Singapore 117574

\* Corresponding author:

Tel: + (65) 6516-1268 Fax: + (65) 6776-3604 E-mail: [msewangj@nus.edu.sg](mailto:msewangj@nus.edu.sg)

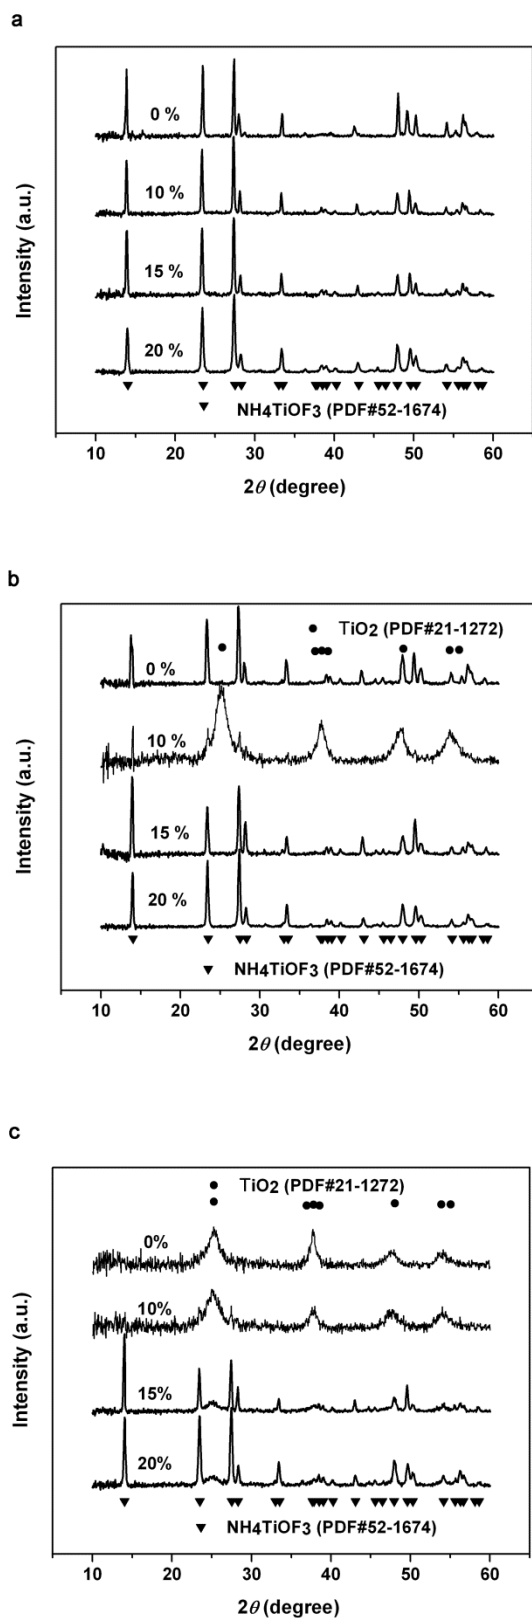

Fig. S1 XRD of as-synthesized particles prepared at various temperature and concentrations of surfactant F127. (a) 4 °C; (b) 23 °C; (c) 35 °C.

Table S1 Summary of the particles synthesized at various conditions based on SEM and XRD results.

| Reaction Condition | Crystalline Phase(s)                                 | Morphology                          |
|--------------------|------------------------------------------------------|-------------------------------------|
| F127 0%, 4 °C      | NH <sub>4</sub> TiOF <sub>3</sub>                    | aggregated mesocrystal              |
| F127 2% , 4 °C     | NH <sub>4</sub> TiOF <sub>3</sub>                    | Submicron particle                  |
| F127 5% , 4 °C     | NH <sub>4</sub> TiOF <sub>3</sub>                    | mesocrystal & submicron<br>particle |
| F127 10% , 4 °C    | NH <sub>4</sub> TiOF <sub>3</sub>                    | mesocrystal                         |
| F127 15% , 4 °C    | NH <sub>4</sub> TiOF <sub>3</sub>                    | mesocrystal                         |
| F127 20% , 4 °C    | NH <sub>4</sub> TiOF <sub>3</sub>                    | mesocrystal & submicron<br>particle |
| F127 0%, 23 °C     | NH <sub>4</sub> TiOF <sub>3</sub>                    | aggregated mesocrystal              |
| F127 2% , 23 °C    | NH <sub>4</sub> TiOF <sub>3</sub> & TiO <sub>2</sub> | Submicron particle &<br>aggregate   |
| F127 5% , 23 °C    | NH <sub>4</sub> TiOF <sub>3</sub> & TiO <sub>2</sub> | Submicron particle &<br>aggregate   |
| F127 10% , 23 °C   | NH <sub>4</sub> TiOF <sub>3</sub> & TiO <sub>2</sub> | Submicron particle                  |
| F127 15% , 23 °C   | NH <sub>4</sub> TiOF <sub>3</sub>                    | mesocrystal & submicron<br>particle |
| F127 20% , 23 °C   | NH <sub>4</sub> TiOF <sub>3</sub>                    | mesocrystal & submicron<br>particle |
| F127 0%, 35 °C     | TiO <sub>2</sub>                                     | aggregate                           |

|                  |                                                      |                                  |
|------------------|------------------------------------------------------|----------------------------------|
| F127 2% , 35 °C  | TiO <sub>2</sub>                                     | Submicron particle & aggregate   |
| F127 5% , 35 °C  | TiO <sub>2</sub>                                     | Submicron particle & aggregate   |
| F127 10% , 35 °C | TiO <sub>2</sub>                                     | Submicron particle               |
| F127 15% , 35 °C | NH <sub>4</sub> TiOF <sub>3</sub> & TiO <sub>2</sub> | mesocrystal & Submicron particle |
| F127 20% , 35 °C | NH <sub>4</sub> TiOF <sub>3</sub> & TiO <sub>2</sub> | mesocrystal & Submicron particle |

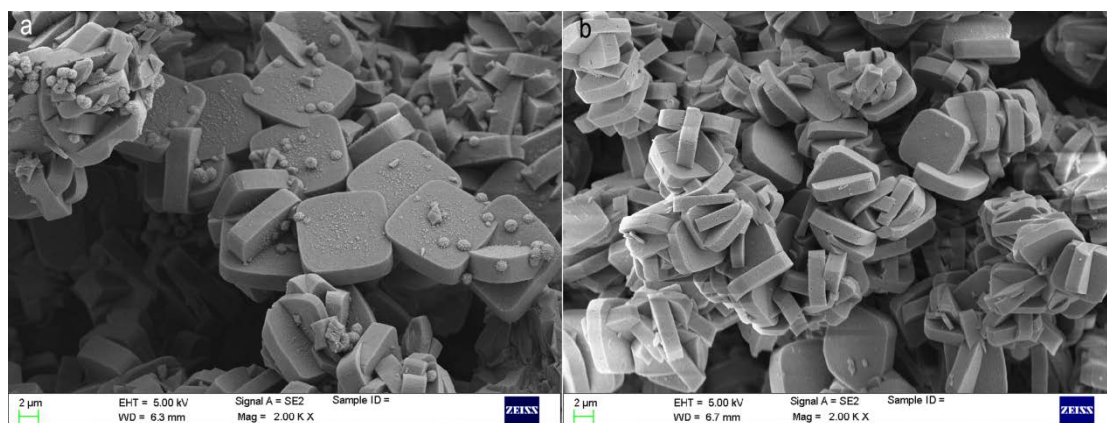

Fig. S2 SEM images of the as-synthesized aggregated NH<sub>4</sub>TiOF<sub>3</sub> mesocrystals grown at 23 °C for 3 days with (a) 10% of PEG 2000 and (b) 10% of PEG 20000.

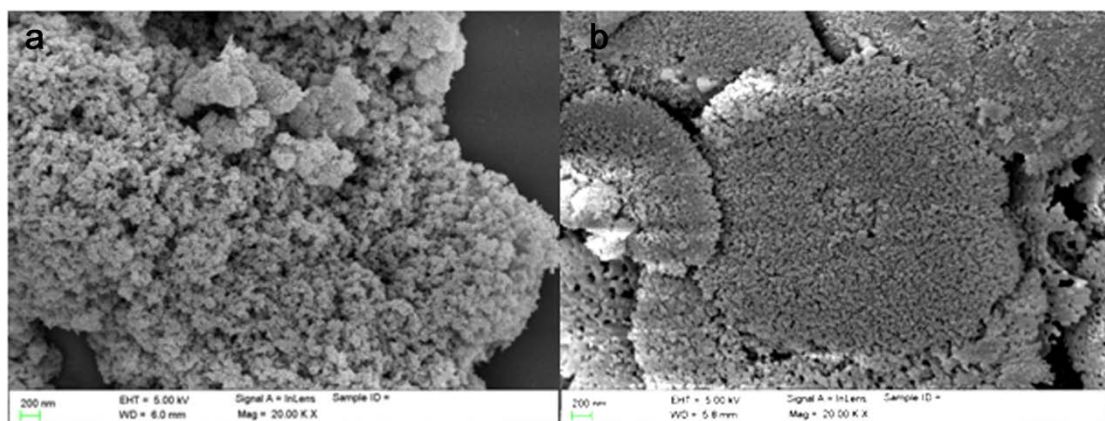

Fig. S3 SEM images of the calcined products of particles prepared at 23 °C with (a) 10% and (b) 15% of F127.
